# Supplementary material
Source: PubMed Central journal article supplement (PMC1913163)
Supplement: biophysj_106.096982_1.pdf [file biophysj_106.096982_1.pdf]

## Supplemental material – hydrophobicity analysis of BR

| Hydrophobicity scale |                                            |                                              | Helix A              |                         |                                                    | Helix B              |                         |                                                    |
|----------------------|--------------------------------------------|----------------------------------------------|----------------------|-------------------------|----------------------------------------------------|----------------------|-------------------------|----------------------------------------------------|
| Amino acid type      | $\Delta G_i(\text{core})$<br>(kcal/mol aa) | $\Delta G_i$<br>(interface)<br>(kcal/mol aa) | Core count<br>(aa)   | Interface<br>count (aa) | $\Delta G_i$ (core and<br>interface)<br>(kcal/mol) | Core count<br>(aa)   | Interface<br>count (aa) | $\Delta G_i$ (core and<br>interface)<br>(kcal/mol) |
| Ala (A)              | 0,5                                        | 0,17                                         | 2                    | 1                       | 1,17                                               | 3                    | 1                       | 1,67                                               |
| Arg (R)              | 1,81                                       | 0,81                                         | 0                    | 0                       | 0                                                  | 0                    | 0                       | 0                                                  |
| Asn (N)              | 0,85                                       | 0,42                                         | 0                    | 0                       | 0                                                  | 0                    | 0                       | 0                                                  |
| Asp (D)              | 3,64                                       | 1,23                                         | 0                    | 2                       | 2,46                                               | 0                    | 1                       | 1,23                                               |
| Cys (C)              | -0,02                                      | -0,24                                        | 0                    | 0                       | 0                                                  | 0                    | 0                       | 0                                                  |
| Gln (Q)              | 0,77                                       | 0,58                                         | 0                    | 0                       | 0                                                  | 0                    | 0                       | 0                                                  |
| Glu (E)              | 3,63                                       | 2,02                                         | 0                    | 1                       | 2,02                                               | 0                    | 0                       | 0                                                  |
| Gly (G)              | 1,15                                       | 0,01                                         | 5                    | 0                       | 5,75                                               | 0                    | 0                       | 0                                                  |
| His (H)              | 2,33                                       | 0,96                                         | 0                    | 0                       | 0                                                  | 0                    | 0                       | 0                                                  |
| Ile (I)              | -1,12                                      | -0,31                                        | 0                    | 1                       | -0,31                                              | 2                    | 0                       | -2,24                                              |
| Leu (L)              | -1,25                                      | -0,56                                        | 6                    | 0                       | -7,5                                               | 1                    | 3                       | -2,93                                              |
| Lys (K)              | 2,8                                        | 0,99                                         | 1                    | 1                       | 3,79                                               | 0                    | 2                       | 1,98                                               |
| Met (M)              | -0,67                                      | -0,23                                        | 2                    | 0                       | -1,34                                              | 1                    | 1                       | -0,9                                               |
| Phe (F)              | -1,71                                      | -1,13                                        | 1                    | 0                       | -1,71                                              | 2                    | 0                       | -3,42                                              |
| Pro (P)              | 0,14                                       | 0,45                                         | 0                    | 2                       | 0,9                                                | 1                    | 1                       | 0,59                                               |
| Ser (S)              | 0,46                                       | 0,13                                         | 1                    | 0                       | 0,46                                               | 0                    | 1                       | 0,13                                               |
| Thr (T)              | 0,25                                       | 0,14                                         | 2                    | 0                       | 0,5                                                | 3                    | 0                       | 0,75                                               |
| Trp (W)              | -2,09                                      | -1,85                                        | 0                    | 2                       | -3,7                                               | 0                    | 0                       | 0                                                  |
| Tyr (Y)              | -0,71                                      | -0,94                                        | 1                    | 0                       | -0,71                                              | 2                    | 0                       | -1,42                                              |
| Val (V)              | -0,46                                      | 0,07                                         | 2                    | 0                       | -0,92                                              | 1                    | 0                       | -0,46                                              |
|                      |                                            |                                              | $\Delta G_i$ (total) |                         |                                                    | $\Delta G_i$ (total) |                         |                                                    |
|                      |                                            |                                              | <b>0,86</b>          |                         |                                                    | <b>-5,02</b>         |                         |                                                    |

| Helix C              |                         |                                                    | Helix D              |                         |                                                    | Helix E              |                         |                                                    |
|----------------------|-------------------------|----------------------------------------------------|----------------------|-------------------------|----------------------------------------------------|----------------------|-------------------------|----------------------------------------------------|
| Core count<br>(aa)   | Interface<br>count (aa) | $\Delta G_i$ (core and<br>interface)<br>(kcal/mol) | Core count<br>(aa)   | Interface<br>count (aa) | $\Delta G_i$ (core and<br>interface)<br>(kcal/mol) | Core count<br>(aa)   | Interface<br>count (aa) | $\Delta G_i$ (core and<br>interface)<br>(kcal/mol) |
| 0                    | 3                       | 0,51                                               | 2                    | 1                       | 1,17                                               | 3                    | 0                       | 1,5                                                |
| 0                    | 1                       | 0,81                                               | 0                    | 0                       | 0                                                  | 0                    | 1                       | 0,81                                               |
| 0                    | 0                       | 0                                                  | 0                    | 0                       | 0                                                  | 0                    | 0                       | 0                                                  |
| 2                    | 1                       | 8,51                                               | 1                    | 0                       | 3,64                                               | 0                    | 0                       | 0                                                  |
| 0                    | 0                       | 0                                                  | 0                    | 0                       | 0                                                  | 0                    | 0                       | 0                                                  |
| 0                    | 0                       | 0                                                  | 0                    | 1                       | 0,58                                               | 0                    | 0                       | 0                                                  |
| 0                    | 0                       | 0                                                  | 0                    | 0                       | 0                                                  | 0                    | 0                       | 0                                                  |
| 0                    | 0                       | 0                                                  | 4                    | 2                       | 4,62                                               | 0                    | 1                       | 0,01                                               |
| 0                    | 0                       | 0                                                  | 0                    | 0                       | 0                                                  | 0                    | 0                       | 0                                                  |
| 0                    | 0                       | 0                                                  | 2                    | 1                       | -2,55                                              | 2                    | 0                       | -2,24                                              |
| 6                    | 2                       | -8,62                                              | 1                    | 3                       | -2,93                                              | 2                    | 1                       | -3,06                                              |
| 0                    | 0                       | 0                                                  | 0                    | 0                       | 0                                                  | 0                    | 0                       | 0                                                  |
| 0                    | 0                       | 0                                                  | 1                    | 0                       | -0,67                                              | 1                    | 0                       | -0,67                                              |
| 1                    | 0                       | -1,71                                              | 0                    | 0                       | 0                                                  | 0                    | 4                       | -4,52                                              |
| 1                    | 0                       | 0,14                                               | 0                    | 0                       | 0                                                  | 0                    | 0                       | 0                                                  |
| 0                    | 0                       | 0                                                  | 0                    | 0                       | 0                                                  | 1                    | 1                       | 0,59                                               |
| 2                    | 0                       | 0,5                                                | 1                    | 1                       | 0,39                                               | 1                    | 0                       | 0,25                                               |
| 1                    | 1                       | -3,94                                              | 0                    | 0                       | 0                                                  | 2                    | 0                       | -4,18                                              |
| 0                    | 1                       | -0,94                                              | 0                    | 0                       | 0                                                  | 2                    | 2                       | -3,3                                               |
| 0                    | 1                       | 0,07                                               | 1                    | 1                       | -0,39                                              | 2                    | 0                       | -0,92                                              |
| $\Delta G_i$ (total) |                         |                                                    | $\Delta G_i$ (total) |                         |                                                    | $\Delta G_i$ (total) |                         |                                                    |
| <b>-4,67</b>         |                         |                                                    | <b>3,86</b>          |                         |                                                    | <b>-15,73</b>        |                         |                                                    |

| Helix F                                |                      |                                              | Helix G                                |                      |                                              |
|----------------------------------------|----------------------|----------------------------------------------|----------------------------------------|----------------------|----------------------------------------------|
| Core count (aa)                        | Interface count (aa) | $\Delta G_t$ (core and interface) (kcal/mol) | Core count (aa)                        | Interface count (aa) | $\Delta G_t$ (core and interface) (kcal/mol) |
| 1                                      | 2                    | 0,84                                         | 1                                      | 0                    | 0,5                                          |
| 1                                      | 0                    | 1,81                                         | 0                                      | 1                    | 0,81                                         |
| 1                                      | 0                    | 0,85                                         | 0                                      | 1                    | 0,42                                         |
| 0                                      | 0                    | 0                                            | 1                                      | 0                    | 3,64                                         |
| 0                                      | 0                    | 0                                            | 0                                      | 0                    | 0                                            |
| 0                                      | 0                    | 0                                            | 0                                      | 0                    | 0                                            |
| 0                                      | 2                    | 4,04                                         | 0                                      | 1                    | 2,02                                         |
| 0                                      | 2                    | 0,02                                         | 2                                      | 0                    | 2,3                                          |
| 0                                      | 0                    | 0                                            | 0                                      | 0                    | 0                                            |
| 1                                      | 0                    | -1,12                                        | 0                                      | 2                    | -0,62                                        |
| 3                                      | 0                    | -3,75                                        | 3                                      | 4                    | -5,99                                        |
| 1                                      | 0                    | 2,8                                          | 1                                      | 0                    | 2,8                                          |
| 0                                      | 0                    | 0                                            | 1                                      | 0                    | -0,67                                        |
| 1                                      | 0                    | -1,71                                        | 2                                      | 0                    | -3,42                                        |
| 1                                      | 1                    | 0,59                                         | 0                                      | 0                    | 0                                            |
| 1                                      | 2                    | 0,72                                         | 1                                      | 0                    | 0,46                                         |
| 2                                      | 0                    | 0,5                                          | 0                                      | 1                    | 0,14                                         |
| 2                                      | 0                    | -4,18                                        | 0                                      | 0                    | 0                                            |
| 1                                      | 0                    | -0,71                                        | 0                                      | 0                    | 0                                            |
| 0                                      | 1                    | 0,07                                         | 3                                      | 0                    | -1,38                                        |
| <b><math>\Delta G_t</math> (total)</b> |                      | <b>0,77</b>                                  | <b><math>\Delta G_t</math> (total)</b> |                      | <b>1,01</b>                                  |
